# Supplementary material for: Mass spectrometry insights into interactions of selenoprotein P with auranofin and cisplatin
Source: Royal Society of Chemistry journal article supplement (doi:10.1039/d2ja00090c), 2022-01-01
Supplement: d2ja00090c1.pdf [file d2ja00090c1.pdf]

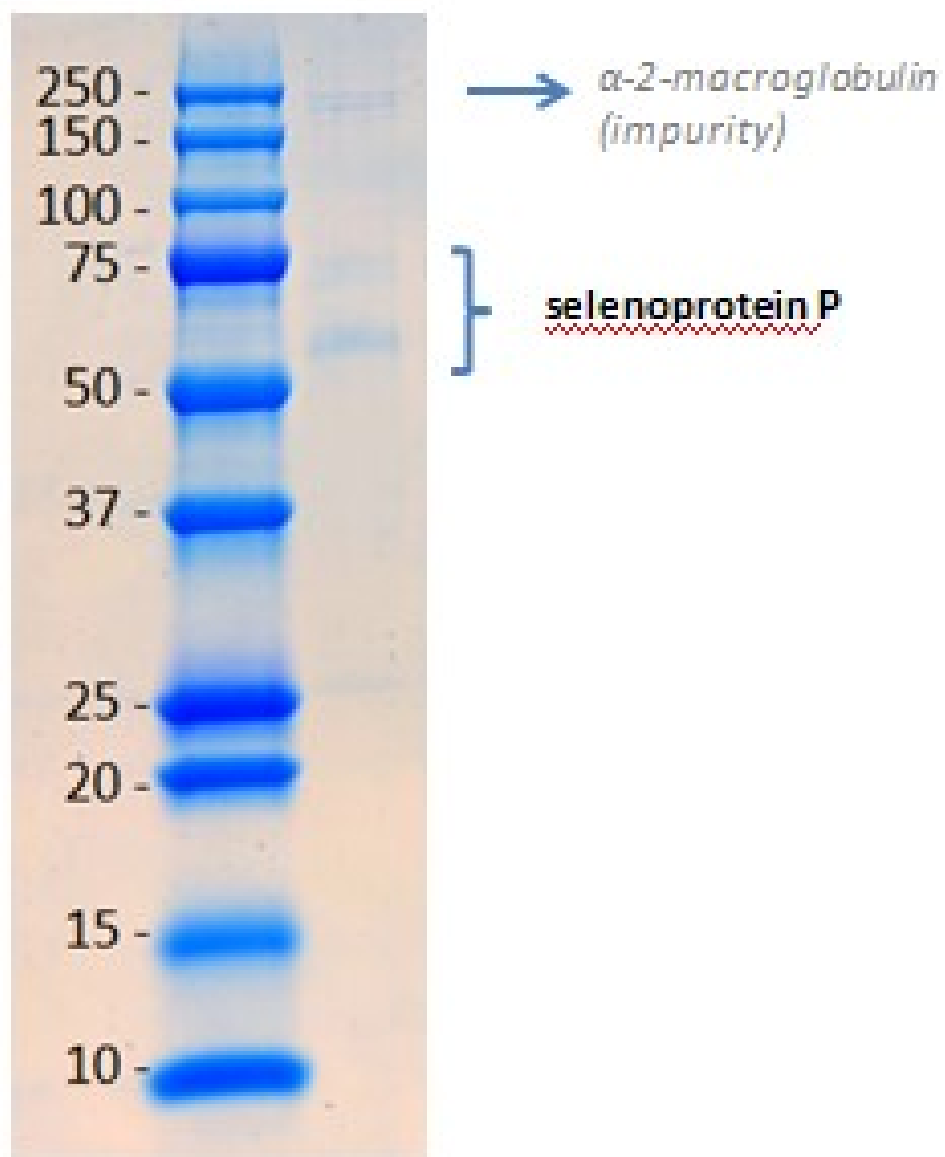

**Fig. SI-1** PAGE analysis of the purified Selp preparation

# FRAGMENTATION of *m/z* 3945 peptide

(a) mono charged fragments

| #1 | Seq.             |            | #2 |                                      |                                      |
|----|------------------|------------|----|--------------------------------------|--------------------------------------|
| 1  | E                |            | 30 |                                      |                                      |
| 2  | S                | 1267.16906 | 29 | <b>b<sup>+</sup></b>                 | <b>y<sup>+</sup></b>                 |
| 3  | C                |            | 28 | <b>b<sup>2+</sup></b>                | <b>y<sup>2+</sup></b>                |
| 4  | Q                |            | 27 | <b>b<sup>3+</sup></b>                | <b>y<sup>3+</sup></b>                |
| 5  | C                |            | 26 | <b>b<sup>4+</sup></b>                | <b>y<sup>4+</sup></b>                |
| 6  | R                |            | 25 | <b>b<sup>5+</sup></b>                | <b>y<sup>5+</sup></b>                |
| 7  | L                |            | 24 |                                      |                                      |
| 8  | P                | 777.80907  | 23 | <b>b-H<sub>2</sub>O<sup>+</sup></b>  | <b>y-H<sub>2</sub>O<sup>+</sup></b>  |
| 9  | P                |            | 22 | <b>b-H<sub>2</sub>O<sup>2+</sup></b> | <b>y-H<sub>2</sub>O<sup>2+</sup></b> |
| 10 | A                | 729.52869  | 21 | <b>b-H<sub>2</sub>O<sup>3+</sup></b> | <b>y-H<sub>2</sub>O<sup>3+</sup></b> |
| 11 | A                |            | 20 | <b>b-H<sub>2</sub>O<sup>4+</sup></b> | <b>y-H<sub>2</sub>O<sup>4+</sup></b> |
| 12 | C-<br>KB_S_sugar |            | 19 | <b>b-H<sub>2</sub>O<sup>5+</sup></b> | <b>y-H<sub>2</sub>O<sup>5+</sup></b> |
| 13 | Q                | 769.98529  | 18 | <b>b-NH<sub>3</sub><sup>+</sup></b>  | <b>y-NH<sub>3</sub><sup>+</sup></b>  |
| 14 | I                | 732.97461  | 17 | <b>b-NH<sub>3</sub><sup>2+</sup></b> | <b>y-NH<sub>3</sub><sup>2+</sup></b> |
| 15 | S                | 689.60441  | 16 | <b>b-NH<sub>3</sub><sup>3+</sup></b> | <b>y-NH<sub>3</sub><sup>3+</sup></b> |
| 16 | Q                | 990.38696  | 15 | <b>b-NH<sub>3</sub><sup>4+</sup></b> | <b>y-NH<sub>3</sub><sup>4+</sup></b> |
| 17 | Q                | 934.87094  | 14 | <b>b-NH<sub>3</sub><sup>5+</sup></b> | <b>y-NH<sub>3</sub><sup>5+</sup></b> |
| 18 | L                | 431.66783  | 13 |                                      |                                      |
| 19 | I                | 814.29962  | 12 |                                      |                                      |
| 20 | P                | 757.75759  | 11 |                                      |                                      |
| 21 | T                |            | 10 |                                      |                                      |
| 22 | E                |            | 9  |                                      |                                      |
| 23 | A                |            | 8  |                                      |                                      |
| 24 | S                |            | 7  |                                      |                                      |
| 25 | A                |            | 6  |                                      |                                      |
| 26 | S                |            | 5  |                                      |                                      |
| 27 | C-KBSecAu        |            | 4  |                                      |                                      |
| 28 | R                |            | 3  |                                      |                                      |
| 29 | C                |            | 2  |                                      |                                      |
| 30 | K                |            | 1  |                                      |                                      |

(b) doubly charged fragments

| #1 |            | Seq.             |           | #2 |
|----|------------|------------------|-----------|----|
| 1  |            | E                |           | 30 |
| 2  |            | S                | 760.70434 | 29 |
| 3  |            | C                |           | 28 |
| 4  |            | Q                |           | 27 |
| 5  |            | C                |           | 26 |
| 6  | 689.24939  | R                |           | 25 |
| 7  | 820.34402  | L                |           | 24 |
| 8  |            | P                | 777.80907 | 23 |
| 9  | 996.43898  | P                |           | 22 |
| 10 |            | A                | 729.52869 | 21 |
| 11 |            | A                |           | 20 |
| 12 |            | C-<br>KB_S_sugar | 694.01014 | 19 |
| 13 |            | Q                | 769.98529 | 18 |
| 14 |            | I                | 732.97461 | 17 |
| 15 | 966.38628  | S                | 689.60441 | 16 |
| 16 | 1030.90758 | Q                | 990.38696 | 15 |
| 17 | 547.97207  | Q                | 934.87094 | 14 |
| 18 | 773.66387  | L                | 580.89686 | 13 |
| 19 |            | I                | 814.29962 | 12 |
| 20 | 628.77729  | P                | 757.75759 | 11 |
| 21 |            | T                |           | 10 |
| 22 | 686.29986  | E                |           | 9  |
| 23 | 704.05914  | A                |           | 8  |
| 24 | 580.85517  | S                |           | 7  |
| 25 | 990.77147  | A                |           | 6  |
| 26 | 765.33443  | S                | 471.11967 | 5  |
| 27 | 881.33930  | C-KBSecAu        |           | 4  |
| 28 | 920.61058  | R                |           | 3  |
| 29 | 757.29176  | C                |           | 2  |
| 30 |            | K                |           | 1  |

(c) triply charged fragments

| #1 |           | Seq.             |            | #2 |
|----|-----------|------------------|------------|----|
| 1  |           | E                |            | 30 |
| 2  |           | S                | 1267.16906 | 29 |
| 3  |           | C                |            | 28 |
| 4  | 431.12311 | Q                | 1209.49750 | 27 |
| 5  |           | C                |            | 26 |
| 6  | 689.24939 | R                |            | 25 |
| 7  |           | L                |            | 24 |
| 8  |           | P                | 777.80907  | 23 |
| 9  | 996.43898 | P                | 758.04852  | 22 |
| 10 |           | A                | 729.52869  | 21 |
| 11 |           | A                |            | 20 |
| 12 |           | C-<br>KB_S_sugar | 698.26677  | 19 |
| 13 |           | Q                | 769.98529  | 18 |
| 14 |           | I                | 732.97461  | 17 |
| 15 | 966.87829 | S                | 689.60441  | 16 |
| 16 | 412.96740 | Q                | 990.38696  | 15 |
| 17 | 547.97207 | Q                | 934.87094  | 14 |
| 18 | 767.98836 | L                | 431.66783  | 13 |
| 19 |           | I                |            | 12 |
| 20 | 628.77729 | P                | 757.75759  | 11 |
| 21 |           | T                |            | 10 |
| 22 |           | E                | 658.70737  | 9  |
| 23 | 704.05914 | A                |            | 8  |
| 24 | 580.85517 | S                |            | 7  |
| 25 | 991.09948 | A                |            | 6  |
| 26 | 765.33443 | S                |            | 5  |
| 27 |           | C                |            | 4  |
| 28 | 740.09523 | R                |            | 3  |
| 29 | 757.29176 | C-KBSecAu        |            | 2  |
| 30 |           | K                |            | 1  |

(d) +4 charged fragments

| #1 |            | Seq.             |            | #2 |
|----|------------|------------------|------------|----|
| 1  |            | E                |            | 30 |
| 2  |            | S                | 760.70434  | 29 |
| 3  |            | C                |            | 28 |
| 4  |            | Q                | 1209.49750 | 27 |
| 5  |            | C                |            | 26 |
| 6  | 689.24939  | R                |            | 25 |
| 7  |            | L                |            | 24 |
| 8  |            | P                | 777.80907  | 23 |
| 9  | 996.43898  | P                | 758.04852  | 22 |
| 10 |            | A                | 729.52869  | 21 |
| 11 |            | A                |            | 20 |
| 12 |            | C-<br>KB_S_sugar | 694.01014  | 19 |
| 13 |            | Q                | 769.98529  | 18 |
| 14 |            | I                | 732.97461  | 17 |
| 15 | 966.38628  | S                | 689.60441  | 16 |
| 16 | 1030.90758 | Q                | 990.38696  | 15 |
| 17 | 547.97207  | Q                | 934.87094  | 14 |
| 18 | 773.66387  | L                | 580.89686  | 13 |
| 19 |            | I                |            | 12 |
| 20 | 628.77729  | P                | 757.75759  | 11 |
| 21 |            | T                |            | 10 |
| 22 | 686.29986  | E                | 658.70737  | 9  |
| 23 | 704.05914  | A                |            | 8  |
| 24 | 580.85517  | S                |            | 7  |
| 25 | 990.77147  | A                |            | 6  |
| 26 | 765.33443  | S                | 471.11967  | 5  |
| 27 |            | C                |            | 4  |
| 28 |            | R                |            | 3  |
| 29 | 757.29176  | C-KBSecAu        |            | 2  |
| 30 |            | K                |            | 1  |

**FRAGMENTATION of *m/z* 3403 peptide**

| #1 |            | Seq.             |            | #2 |  |                                      |
|----|------------|------------------|------------|----|--|--------------------------------------|
| 1  |            | G-Acetyl         |            | 29 |  |                                      |
| 2  |            | S                | 1096.52536 | 28 |  | <b>b<sup>+</sup></b>                 |
| 3  |            | V                |            | 27 |  | <b>b<sup>2+</sup></b>                |
| 4  | 369.17686  | T                | 1034.49188 | 26 |  | <b>b<sup>3+</sup></b>                |
| 5  |            | V                | 1000.80932 | 25 |  | <b>b<sup>4+</sup></b>                |
| 6  |            | V                |            | 24 |  | <b>b<sup>5+</sup></b>                |
| 7  |            | A                |            | 23 |  |                                      |
| 8  |            | L                |            | 22 |  | <b>b-H<sub>2</sub>O<sup>+</sup></b>  |
| 9  |            | L                | 659.55094  | 21 |  | <b>y-H<sub>2</sub>O<sup>+</sup></b>  |
| 10 |            | Q                | 835.36729  | 20 |  | <b>b-H<sub>2</sub>O<sup>2+</sup></b> |
| 11 | 1064.59864 | A                |            | 19 |  | <b>y-H<sub>2</sub>O<sup>2+</sup></b> |
| 12 |            | S                |            | 18 |  | <b>b-H<sub>2</sub>O<sup>3+</sup></b> |
| 13 | 651.79581  | C-<br>S_Se_subst | 745.99491  | 17 |  | <b>y-H<sub>2</sub>O<sup>3+</sup></b> |
| 14 |            | Y                | 1034.49860 | 16 |  | <b>b-H<sub>2</sub>O<sup>4+</sup></b> |
| 15 | 789.86951  | L                | 952.96694  | 15 |  | <b>y-H<sub>2</sub>O<sup>4+</sup></b> |
| 16 | 937.35664  | C-KB_Pt          |            | 14 |  | <b>b-H<sub>2</sub>O<sup>5+</sup></b> |
| 17 |            | I                | 747.95376  | 13 |  | <b>y-H<sub>2</sub>O<sup>5+</sup></b> |
| 18 | 1059.44599 | L                | 700.41701  | 12 |  | <b>b-NH<sub>3</sub><sup>+</sup></b>  |
| 19 | 743.64376  | Q                | 429.58574  | 11 |  | <b>y-NH<sub>3</sub><sup>+</sup></b>  |
| 20 |            | A                |            | 10 |  | <b>b-NH<sub>3</sub><sup>2+</sup></b> |
| 21 | 796.33348  | S                |            | 9  |  | <b>y-NH<sub>3</sub><sup>2+</sup></b> |
| 22 | 839.03180  | K                | 500.81112  | 8  |  | <b>b-NH<sub>3</sub><sup>3+</sup></b> |
| 23 | 657.79668  | L                |            | 7  |  | <b>y-NH<sub>3</sub><sup>3+</sup></b> |
| 24 |            | E                | 759.43593  | 6  |  | <b>b-NH<sub>3</sub><sup>4+</sup></b> |
| 25 |            | D                |            | 5  |  | <b>y-NH<sub>3</sub><sup>4+</sup></b> |
| 26 | 747.08508  | L                |            | 4  |  | <b>b-NH<sub>3</sub><sup>5+</sup></b> |
| 27 | 786.11036  | R                |            | 3  |  | <b>y-NH<sub>3</sub><sup>5+</sup></b> |
| 28 |            | V                |            | 2  |  |                                      |
| 29 |            | K                |            | 1  |  |                                      |
